# Supplementary material
Source: publisher figshare collection journal article supplement (https://geolsoc.figshare.com/ndownloader/files/14229515)
Supplement: Supplementary file 1 [file 14229515]

## Sheet: Table S3
Table S3. Individual Lu-Hf analytical data
Grain number	Hf176/Hf177	2σ error	Lu176/Hf177	Yb176/Hf177	U-Pb AGE	Hfi	εHf	2σ error	T(DM)	T(DM) - Crustal
Z16_26_5	0.28136	7e-05	0.002416	0.0312	2090	0.281264	-6.59	2.5	2.74	3.07
Z16_26_6	0.281443	4.7e-05	0.00191	0.02937	2090	0.281367	-2.93	1.6	2.59	2.85
Z16_26_8	0.281375	4.9e-05	0.000735	0.01182	2090	0.281346	-3.68	1.7	2.6	2.9
Z16_26_10	0.281404	5e-05	0.00321	0.0473	2090	0.281276	-6.15	1.8	2.74	3.05
Z16_26_11	0.281368	5.4e-05	0.002318	0.0345	2090	0.281276	-6.17	1.9	2.73	3.05
Z16_26_12	0.281477	6.4e-05	0.00287	0.0556	2090	0.281363	-3.07	2.2	2.61	2.86
Z16_26_13	0.281423	5.9e-05	0.001406	0.02548	2090	0.281367	-2.93	2.1	2.58	2.85
Z16_26_14	0.281407	7.2e-05	0.001598	0.02772	2090	0.281343	-3.77	2.5	2.62	2.9
Z16_26_16	0.281417	6.3e-05	0.00225	0.0357	2090	0.281328	-4.33	2.2	2.65	2.94
Z16_26_18	0.281044	3.8e-05	0.003108	0.0661	2350	0.280905	-13.33	1.3	3.25	3.67
Z16_26_20	0.281222	4.3e-05	0.003118	0.0652	2664	0.281063	-0.37	1.5	3	3.15
Z16_26_23	0.28132	4.8e-05	0.001307	0.02874	2203	0.281265	-3.93	1.7	2.72	3
Z16_27_2	0.281606	7.7e-05	0.00438	0.0971	2335	0.281411	4.32	2.7	2.53	2.61
Z16_27_3	0.281519	5.1e-05	0.00454	0.0998	2056	0.281342	-4.62	1.8	2.67	2.93
Z16_27_4	0.281441	4.9e-05	0.00089	0.0205	2056	0.281406	-2.32	1.7	2.53	2.79
Z16_27_6	0.281511	6.5e-05	0.00396	0.0874	2056	0.281356	-4.1	2.3	2.64	2.9
Z16_27_9	0.281524	5.2e-05	0.000987	0.02103	2056	0.281485	0.49	1.8	2.42	2.62
Z16_27_13	0.281461	7e-05	0.002535	0.0548	2172	0.281356	-1.41	2.5	2.61	2.83
Z16_27_16	0.281494	5.1e-05	0.00381	0.0794	2056	0.281345	-4.5	1.8	2.66	2.92
Z16_27_17	0.281456	4.9e-05	0.001764	0.04011	2056	0.281387	-3	1.7	2.56	2.83
Z16_27_19	0.281605	7.2e-05	0.002999	0.069	2413	0.281467	8.13	2.5	2.44	2.45
Z16_27_20	0.281627	7.4e-05	0.003183	0.06576	2056	0.281503	1.1	2.6	2.42	2.59
Z16_27_22	0.281406	5.1e-05	0.00176	0.0399	3006	0.281305	16.27	1.8	2.63	2.44
Z16_27_25	0.281415	5.7e-05	0.00419	0.0984	2056	0.281251	-7.83	2	2.8	3.12
Z16_27_27	0.281497	4.7e-05	0.001906	0.03386	2056	0.281422	-1.74	1.6	2.52	2.76
Z16_27_29	0.2812	4.4e-05	0.00232	0.0543	2056	0.281109	-12.87	1.5	2.96	3.42
Z16_27_34	0.281466	7.8e-05	0.00334	0.0621	2056	0.281335	-4.84	2.7	2.66	2.94
Z16_33_22	0.282067	4e-05	0.001357	0.01198	498	0.282054	-14.77	1.4	1.69	2.36
Z16_33_7	0.282016	4.2e-05	0.00334	0.0372	498	0.281985	-17.23	1.5	1.85	2.51
Z16_33_21	0.282048	4.3e-05	0.001462	0.01435	498	0.282034	-15.47	1.5	1.72	2.4
Z16_33_24	0.282114	6.2e-05	0.00509	0.0588	498	0.282067	-14.34	2.2	1.8	2.33
Z16_33_26	0.28192	5.4e-05	0.00609	0.072	498	0.281863	-21.54	1.9	2.16	2.77
Z16_35_2	0.281478	6.7e-05	0.001396	0.03194	1881	0.281428	-5.58	2.3	2.51	2.85
Z16_35_3	0.281355	5.2e-05	0.001793	0.04326	1775	0.281295	-12.76	1.8	2.71	3.2
Z16_35_4	0.28136	4.8e-05	0.000592	0.015	1598	0.281342	-15.14	1.7	2.62	3.2
Z16_35_5	0.281587	5.6e-05	0.001713	0.03432	1737	0.281531	-5.26	2	2.38	2.72
Z16_35_6	0.281443	5.2e-05	0.00279	0.0619	2015	0.281336	-5.76	1.8	2.65	2.96
Z16_35_7	0.281594	6.6e-05	0.001167	0.02329	1651	0.281558	-6.28	2.3	2.33	2.71
Z16_35_8	0.28142	6e-05	0.00299	0.0632	2080	0.281302	-5.48	2.1	2.7	3
Z16_35_9	0.281491	4.6e-05	0.002045	0.03637	1787	0.281422	-7.98	1.6	2.53	2.92
Z16_35_10	0.281554	6.2e-05	0.00223	0.04	1820	0.281477	-5.25	2.2	2.46	2.78
Z16_35_11	0.281433	5e-05	0.002213	0.04	1780	0.281358	-10.39	1.8	2.63	3.06
Z16_35_12	0.28138	6.8e-05	0.003419	0.0552	2035	0.281248	-8.44	2.4	2.79	3.14
Z16_35_13	0.281372	4.5e-05	0.001071	0.02098	1621	0.281339	-14.71	1.6	2.63	3.2
Z16_35_16	0.281374	5.1e-05	0.00284	0.0507	1904	0.281271	-10.62	1.8	2.76	3.17
Z16_35_17	0.281413	3.9e-05	0.004145	0.06257	1885	0.281265	-11.3	1.4	2.8	3.19
Z16_35_19	0.281348	4.1e-05	0.001978	0.03582	1673	0.281285	-15.43	1.4	2.73	3.28
Z16_35_20	0.281264	5.5e-05	0.002047	0.03294	1912	0.28119	-13.34	1.9	2.85	3.34
Z16_35_21	0.281453	5.9e-05	0.0019222	0.02887	1990	0.28138	-4.77	2.1	2.58	2.89
Z16_35_25	0.281468	4.6e-05	0.003497	0.05566	1798	0.281349	-10.31	1.6	2.67	3.07
Z16_35_26	0.281594	5.4e-05	0.00375	0.0521	1818	0.281465	-5.74	1.9	2.5	2.81
Z16_35_27	0.281423	5.1e-05	0.003565	0.0483	1996	0.281288	-7.92	1.8	2.74	3.08
Z16_35_28	0.281372	6.6e-05	0.00373	0.0434	1829	0.281243	-13.37	2.3	2.83	3.27
Z16_35_29	0.281376	6e-05	0.003181	0.0361	1714	0.281273	-14.94	2.1	2.78	3.28
Z16_35_30	0.281422	4.5e-05	0.00437	0.0546	1714	0.28128	-14.68	1.6	2.81	3.27
Z16_35_31	0.281557	4.6e-05	0.00246	0.0352	1858	0.28147	-4.62	1.6	2.47	2.77
Z16_35_32	0.28167	4.8e-05	0.0067	0.0858	1658	0.28146	-9.59	1.7	2.61	2.92
Z16_35_33	0.281453	6.8e-05	0.002723	0.03697	1952	0.281352	-6.65	2.4	2.63	2.97
Z16_35_34	0.281495	3.9e-05	0.002333	0.03123	1847	0.281413	-6.9	1.4	2.55	2.9
Z16_35_35	0.281496	7.4e-05	0.00192	0.02218	1780	0.281431	-7.8	2.6	2.52	2.91
Z16_35_36	0.281428	6.2e-05	0.003749	0.0467	2056	0.281281	-6.76	2.2	2.75	3.06
Z16_35_37	0.281446	4.2e-05	0.003207	0.03755	1582	0.28135	-15.22	1.5	2.68	3.2
Z16_40_2	0.281533	4.9e-05	0.001913	0.06419	2009	0.28146	-1.5	1.7	2.47	2.71
Z16_40_5	0.281439	4.6e-05	0.001449	0.05186	2009	0.281384	-4.21	1.6	2.57	2.87
Z16_40_7	0.281412	5.7e-05	0.00144	0.0413	2009	0.281357	-5.16	2	2.6	2.92
Z16_40_8	0.281457	5.8e-05	0.001034	0.03842	2009	0.281418	-3.01	2	2.51	2.8
Z16_40_12	0.281454	5.1e-05	0.002297	0.0853	2009	0.281366	-4.83	1.8	2.6	2.9
Z16_40_14	0.28153	5.1e-05	0.0016	0.0603	2009	0.281469	-1.18	1.8	2.45	2.69
Z16_40_17	0.281454	4.6e-05	0.001356	0.052	2009	0.281402	-3.55	1.6	2.54	2.83
Z16_40_23	0.281521	6.4e-05	0.001322	0.05119	2009	0.281471	-1.13	2.2	2.44	2.68
Z16_40_24	0.281555	3.7e-05	0.002804	0.1115	2009	0.281448	-1.93	1.3	2.49	2.73
Z16_40_25	0.281548	4.6e-05	0.001404	0.0524	2009	0.281494	-0.28	1.6	2.41	2.63
Z16_40_27	0.281413	4.4e-05	0.000984	0.04244	2009	0.281375	-4.5	1.5	2.57	2.88
Z16_40_29	0.281472	5e-05	0.001813	0.0801	2009	0.281403	-3.53	1.8	2.54	2.83
Z16_40_31	0.2814	4.3e-05	0.001292	0.0551	2009	0.281351	-5.38	1.5	2.61	2.94
Z16_40_37	0.281488	4.9e-05	0.001573	0.0736	2009	0.281428	-2.64	1.7	2.51	2.77
Z16_40_45	0.281474	6e-05	0.002027	0.0955	2009	0.281397	-3.75	2.1	2.56	2.84
Z16_41_20	0.282213	5.8e-05	0.001	0.0525	1040	0.282193	2.35644	2.03	1.46648	1.714
Z16_41_21	0.282238	6.5e-05	0.000518	0.02483	1040	0.282228	3.57717	2.275	1.41362	1.63844
Z16_41_23	0.282227	5.7e-05	0.000531	0.025	1040	0.282217	3.17825	1.995	1.42926	1.66314
Z16_41_24	0.282216	4.7e-05	0.000551	0.02397	1040	0.282205	2.77447	1.645	1.44518	1.68813
Z16_41_26	0.282234	6.2e-05	0.000727	0.0367	1040	0.28222	3.29031	2.17	1.4269	1.6562
Z16_41_27	0.282274	4.9e-05	0.000589	0.0316	1040	0.282262	4.80391	1.715	1.36649	1.5624
Z16_41_28	0.282219	4.9e-05	0.0004563	0.02287	1040	0.28221	2.94655	1.715	1.43749	1.67749
Z16_41_29	0.282237	4.6e-05	0.0005232	0.0289	1040	0.282227	3.53812	1.61	1.41519	1.64086
Z16_41_30	0.282224	7.4e-05	0.000356	0.02342	1040	0.282217	3.1934	2.59	1.42689	1.6622
Z16_41_33	0.282276	5.4e-05	0.000615	0.0419	1040	0.282264	4.85675	1.89	1.36465	1.55913
Z16_41_34	0.282252	5.2e-05	0.000543	0.03608	1040	0.282241	4.05605	1.82	1.39522	1.60877
Z16_41_35	0.282246	5.2e-05	0.0005855	0.0418	1040	0.282235	3.81388	1.82	1.40506	1.62378
Z16_41_36	0.28226	4.5e-05	0.0002578	0.01818	1040	0.282255	4.5376	1.575	1.37396	1.57892
Z16_41_37	0.28227	5.8e-05	0.0003787	0.02634	1040	0.282263	4.80812	2.03	1.36453	1.56214
Z16_41_38	0.282253	4.5e-05	0.0003186	0.02187	1040	0.282247	4.24727	1.575	1.38573	1.59692
Z16_42_1	0.282199	6.3e-05	0.0006199	0.04557	1039	0.282187	2.10184	2.205	1.47126	1.72896
Z16_42_2	0.282238	5e-05	0.000397	0.02809	1039	0.28223	3.63879	1.75	1.40917	1.63384
Z16_42_3	0.28224	4.4e-05	0.000383	0.0271	1039	0.282233	3.71938	1.54	1.40591	1.62885
Z16_42_4	0.282203	5.1e-05	0.000581	0.03837	1039	0.282192	2.2706	1.785	1.46425	1.71853
Z16_42_5	0.282265	7e-05	0.000478	0.03393	1039	0.282256	4.53962	2.45	1.37495	1.57801
Z16_42_6	0.28226	7.1e-05	0.00058	0.0401	1039	0.282249	4.29166	2.485	1.38552	1.59338
Z16_42_7	0.282247	5.4e-05	0.000685	0.0462	1039	0.282234	3.75805	1.89	1.40733	1.62645
Z16_42_8	0.282236	6.3e-05	0.000498	0.03144	1039	0.282226	3.49785	2.205	1.41564	1.64257
Z16_42_9	0.28219	5.2e-05	0.000326	0.0184	1039	0.282184	1.98667	1.82	1.47239	1.73608
Z16_42_10	0.282241	5.5e-05	0.000396	0.0264	1039	0.282233	3.74581	1.925	1.40501	1.62721
Z16_42_16	0.282273	5.1e-05	0.000641	0.0446	1039	0.28226	4.71014	1.785	1.36973	1.56743
Z16_42_18	0.28221	5.5e-05	0.000401	0.0234	1039	0.282202	2.64355	1.925	1.44779	1.69546
Z16_42_20	0.282248	4.5e-05	0.0003252	0.01756	1039	0.282242	4.04303	1.575	1.39283	1.60879
Z16_42_21	0.282228	3.7e-05	0.00055	0.0348	1039	0.282217	3.17823	1.295	1.42859	1.66236
Z16_42_23	0.28223	7.8e-05	0.000667	0.0415	1039	0.282217	3.16797	2.73	1.43019	1.663
